# Supplementary material for: A mechanistic study of the photocatalytic activity of AgI–WO3 in an experimentally designed approach toward methylene blue photodegradation
Source: Royal Society of Chemistry journal article supplement (doi:10.1039/d2cy01815b), 2022-12-14
Supplement: d2cy01815b1.pdf [file d2cy01815b1.pdf]

**Supplementary data:**

**A mechanism study for the photocatalytic activity of AgI-WO<sub>3</sub> in an  
experimental designed methylene blue photocatalysis**

**Shirin Ghattavi<sup>a,b,\*</sup>, Alireza Nezamzadeh-Ejhieh<sup>a,b,c,\*</sup>**

<sup>a</sup> Department of Chemistry, Shahreza Branch, Islamic Azad University, P.O.  
Box 311-86145, Shahreza, Isfahan, Islamic Republic of Iran

<sup>b</sup> Department of Chemistry, Firoozabad Branch, Islamic Azad University,  
Firoozabad, Islamic Republic of Iran

<sup>c</sup> Razi Chemistry Research Center (RCRC), Shahreza Branch, Islamic Azad  
University, Isfahan, Islamic Republic of Iran

**Corresponding author should be addressed:** [arnezamzadeh@iaush.ac.ir](mailto:arnezamzadeh@iaush.ac.ir) (A.  
Nezamzadeh-Ejhieh), [Sh.ghatavi@iauf.ac.ir](mailto:Sh.ghatavi@iauf.ac.ir) (SH. Ghattavi).

**Tables:**

**SDT1.** Suggest RSM run's conditions in study of MB photodegradation by AgI/WO<sub>3</sub> catalyst.

| <b>Std</b> | <b>Run</b> | <b>A:pH</b> | <b>B:MB Dose</b> | <b>C:Cat dose</b> | <b>D:time</b> | <b>R1</b>    |
|------------|------------|-------------|------------------|-------------------|---------------|--------------|
|            |            |             | <b>ppm</b>       | <b>mg/10 mL</b>   | <b>min</b>    | <b>Deg.%</b> |
| 12         | 1          | 8           | 7.75             | 5.75              | 25            | 72           |
| 10         | 2          | 8           | 3.25             | 5.75              | 25            | 78           |
| 9          | 3          | 4           | 3.25             | 5.75              | 25            | 91           |
| 11         | 4          | 4           | 7.75             | 5.75              | 25            | 92           |
| 16         | 5          | 8           | 7.75             | 15.25             | 25            | 91           |
| 13         | 6          | 4           | 3.25             | 15.25             | 25            | 99           |
| 5          | 7          | 4           | 3.25             | 15.25             | 15            | 95           |
| 20         | 8          | 6           | 5.5              | 10.5              | 20            | 92           |
| 6          | 9          | 8           | 3.25             | 15.25             | 15            | 94           |
| 7          | 10         | 4           | 7.75             | 15.25             | 15            | 97           |
| 18         | 11         | 6           | 5.5              | 10.5              | 20            | 92           |
| 3          | 12         | 4           | 7.75             | 5.75              | 15            | 97           |
| 14         | 13         | 8           | 3.25             | 15.25             | 25            | 97           |
| 4          | 14         | 8           | 7.75             | 5.75              | 15            | 82           |
| 8          | 15         | 8           | 7.75             | 15.25             | 15            | 92           |
| 2          | 16         | 8           | 3.25             | 5.75              | 15            | 91           |
| 15         | 17         | 4           | 7.75             | 15.25             | 25            | 97           |
| 19         | 18         | 6           | 5.5              | 10.5              | 20            | 91           |
| 17         | 19         | 6           | 5.5              | 10.5              | 20            | 91           |
| 1          | 20         | 4           | 3.25             | 5.75              | 15            | 94           |
| 27         | 21         | 6           | 5.5              | 10.5              | 10            | 90           |
| 26         | 22         | 6           | 5.5              | 20                | 20            | 91           |
| 30         | 23         | 6           | 5.5              | 10.5              | 20            | 92           |
| 23         | 24         | 6           | 1                | 10.5              | 20            | 86           |
| 22         | 25         | 10          | 5.5              | 10.5              | 20            | 87           |
| 25         | 26         | 6           | 5.5              | 1                 | 20            | 69           |
| 29         | 27         | 6           | 5.5              | 10.5              | 20            | 88           |
| 24         | 28         | 6           | 10               | 10.5              | 20            | 72           |
| 28         | 29         | 6           | 5.5              | 10.5              | 30            | 90           |
| 21         | 30         | 2           | 5.5              | 10.5              | 20            | 95           |

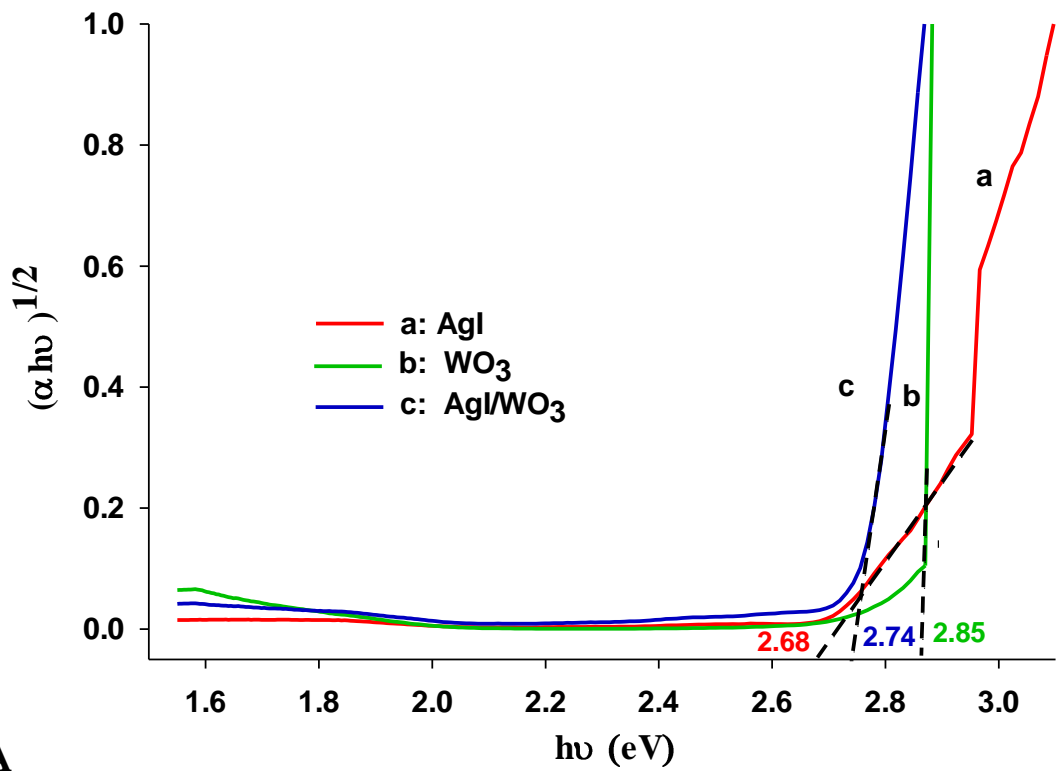

**A**

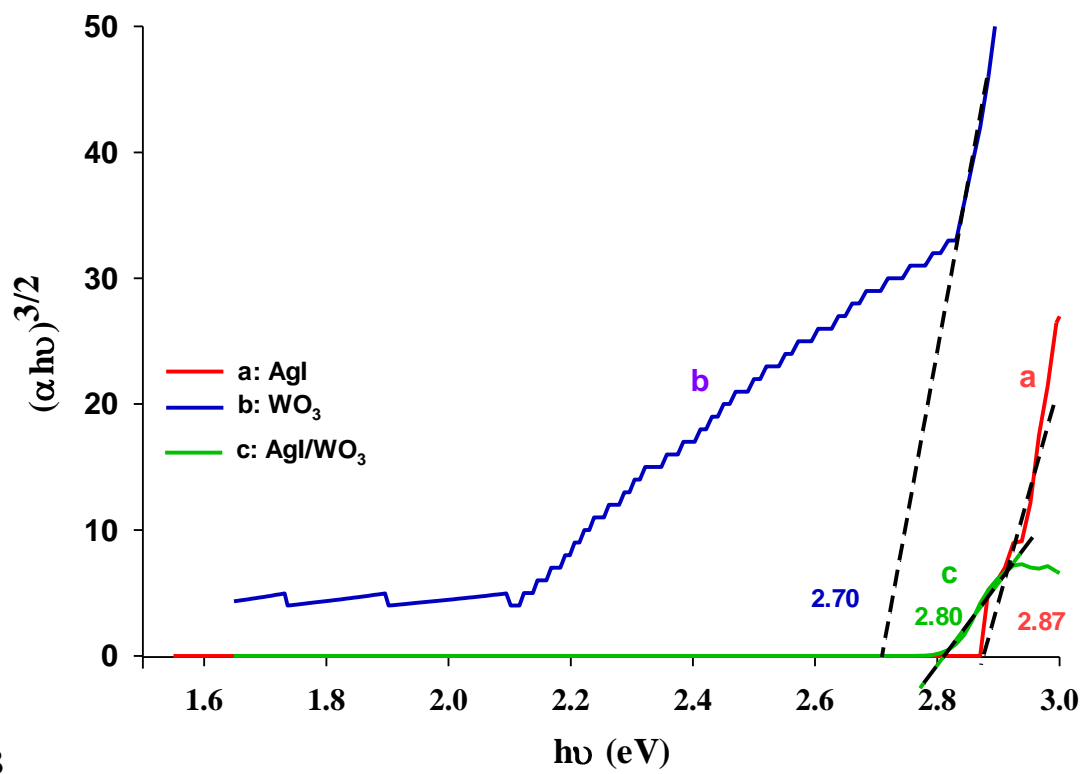

**B**

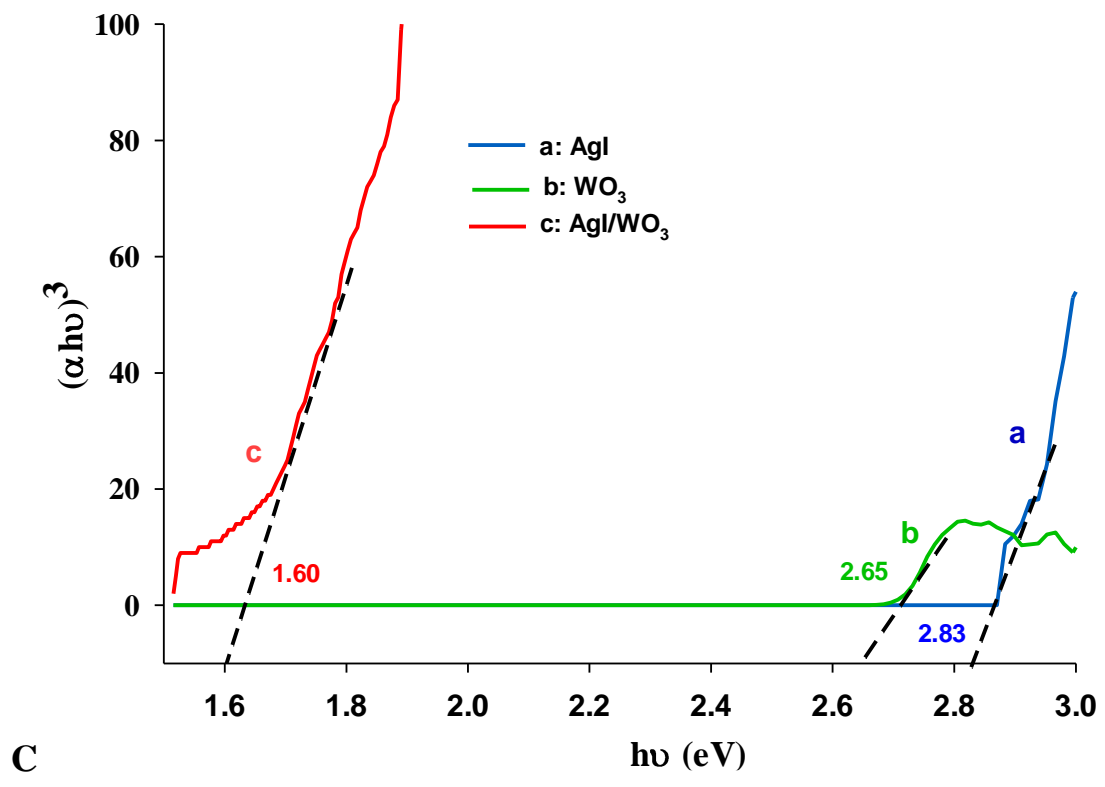

**SDF1.** Other Tauc plots for as-prepared samples.

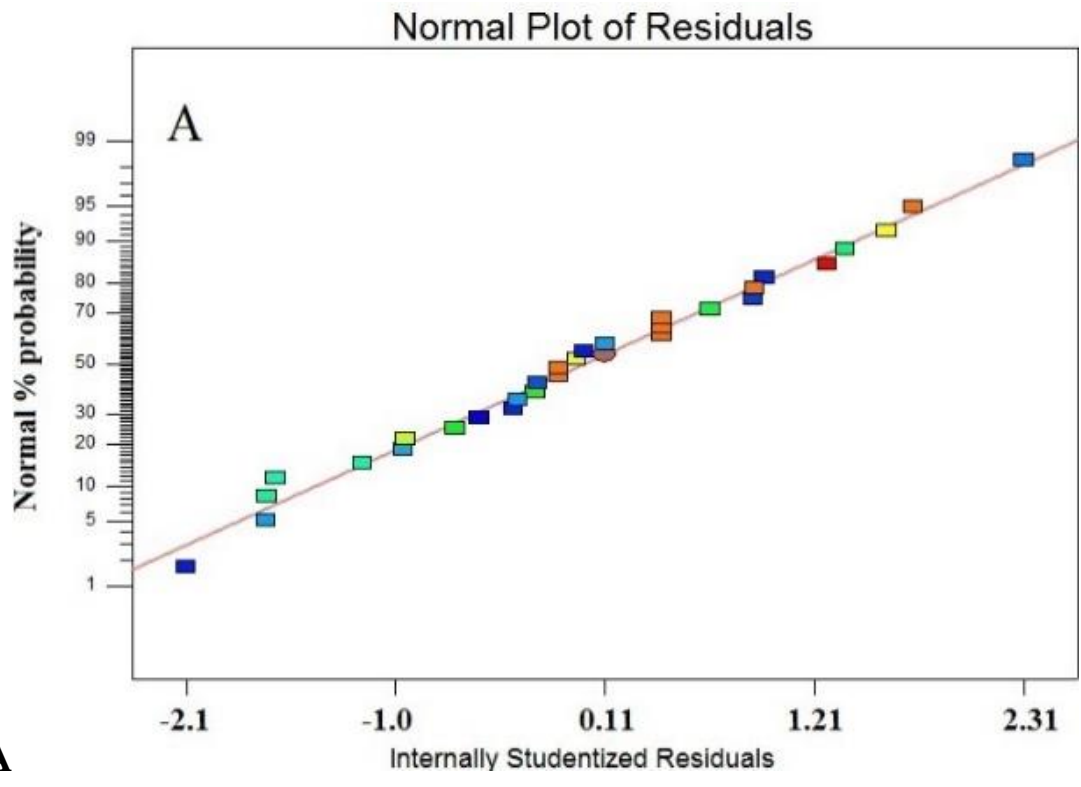

**A**

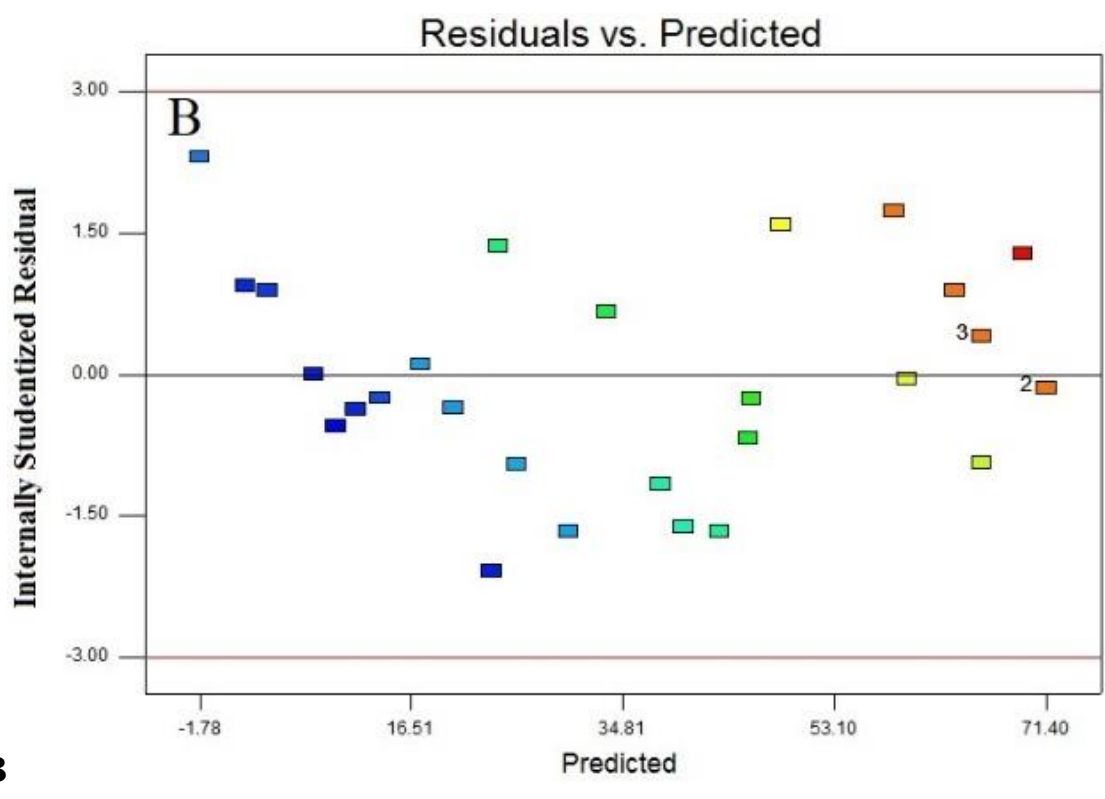

**B**



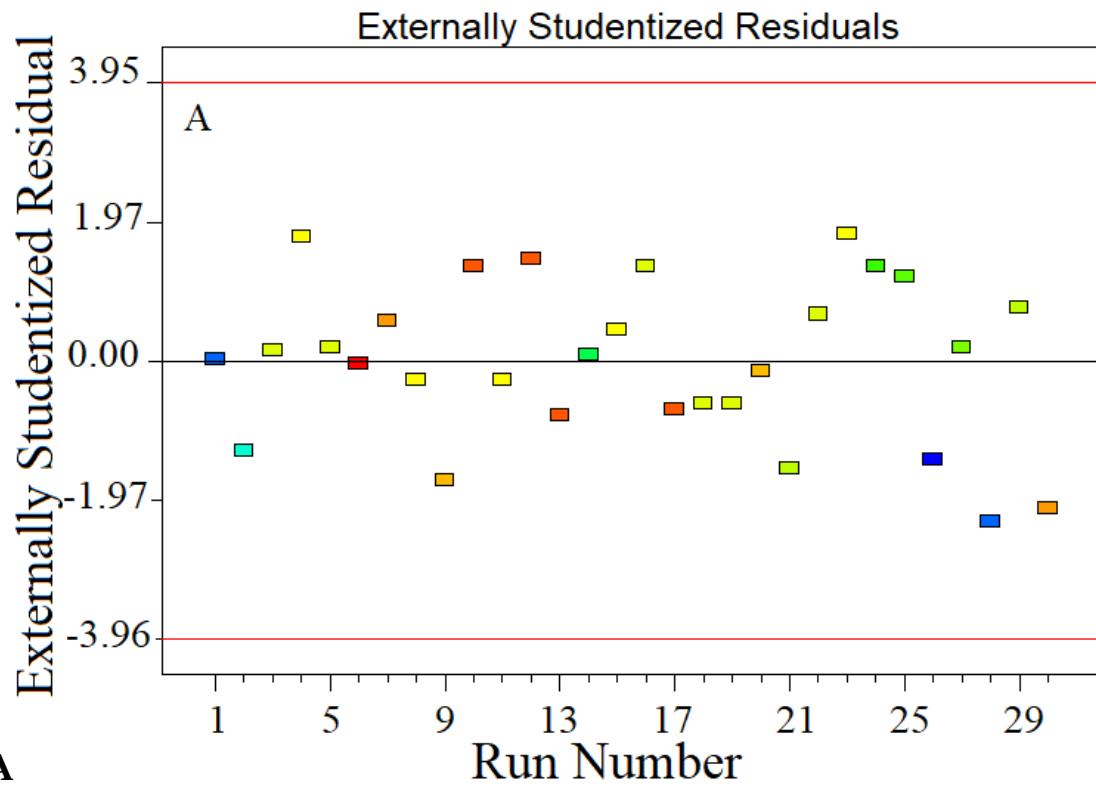

**A**

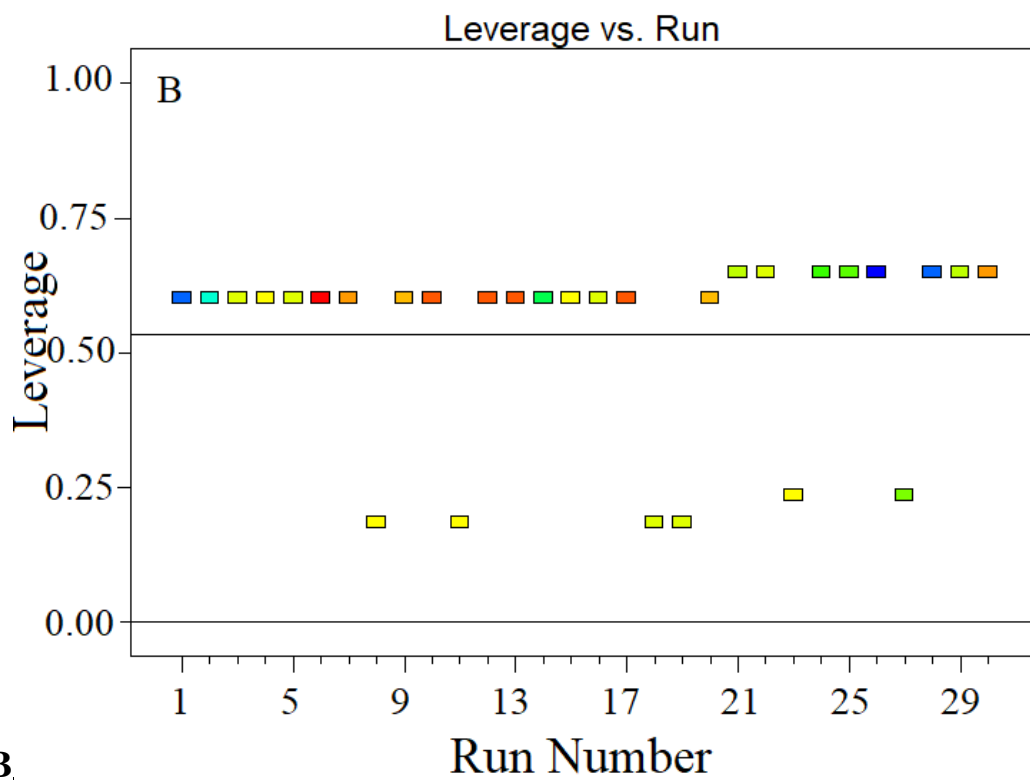

**B**

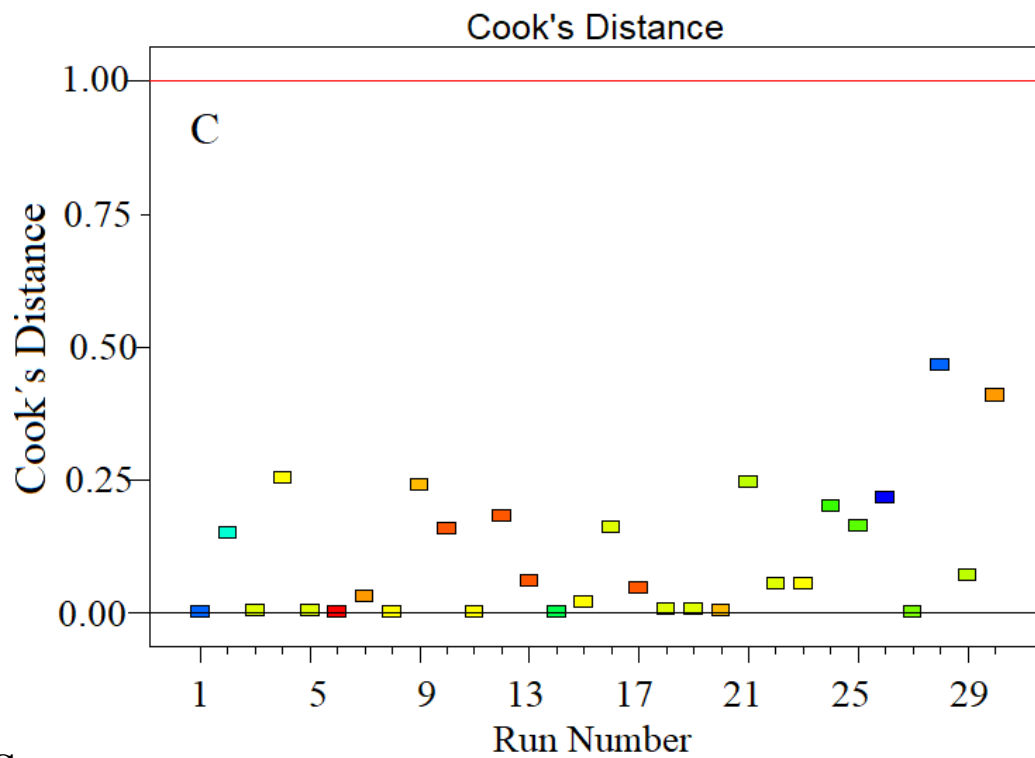

C

**SDF3.** Some influencing plots for the RSM study of MB photodegradation by AgI/WO<sub>3</sub> binary catalyst.



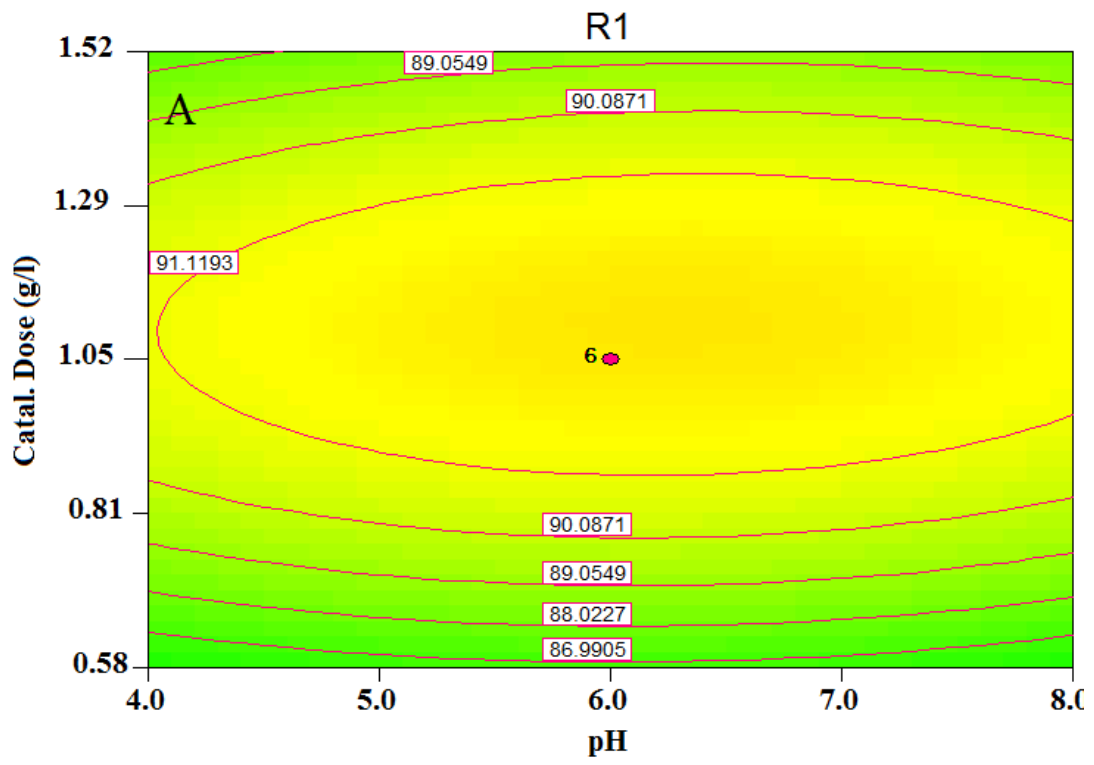

**A**

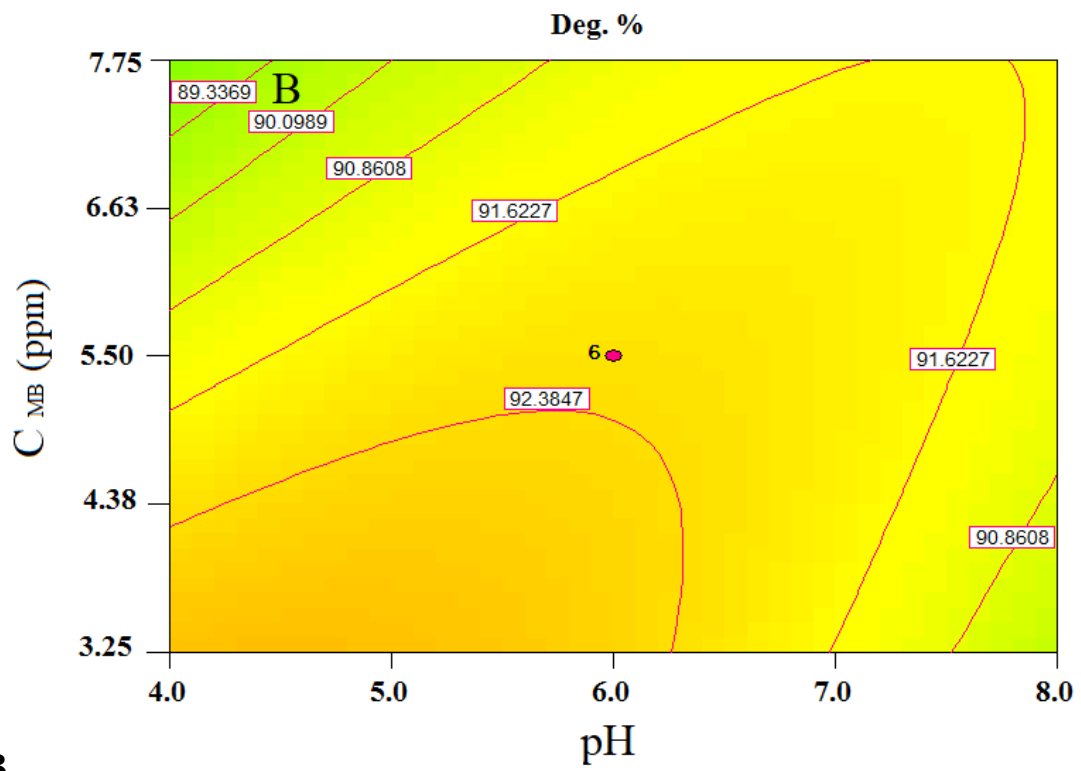

**B**

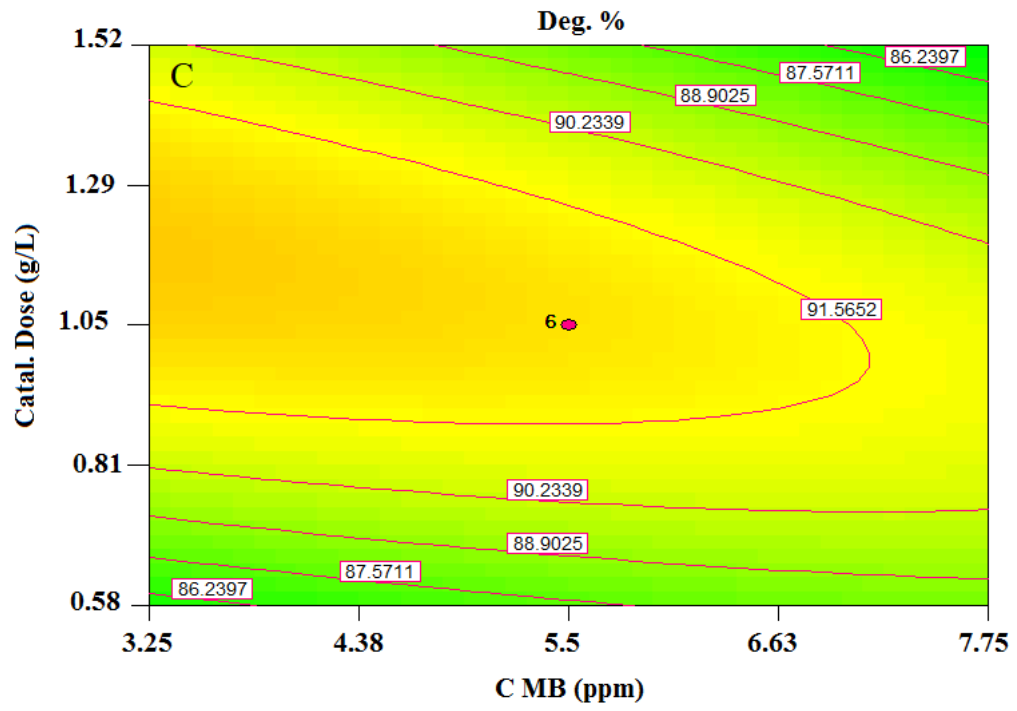

C

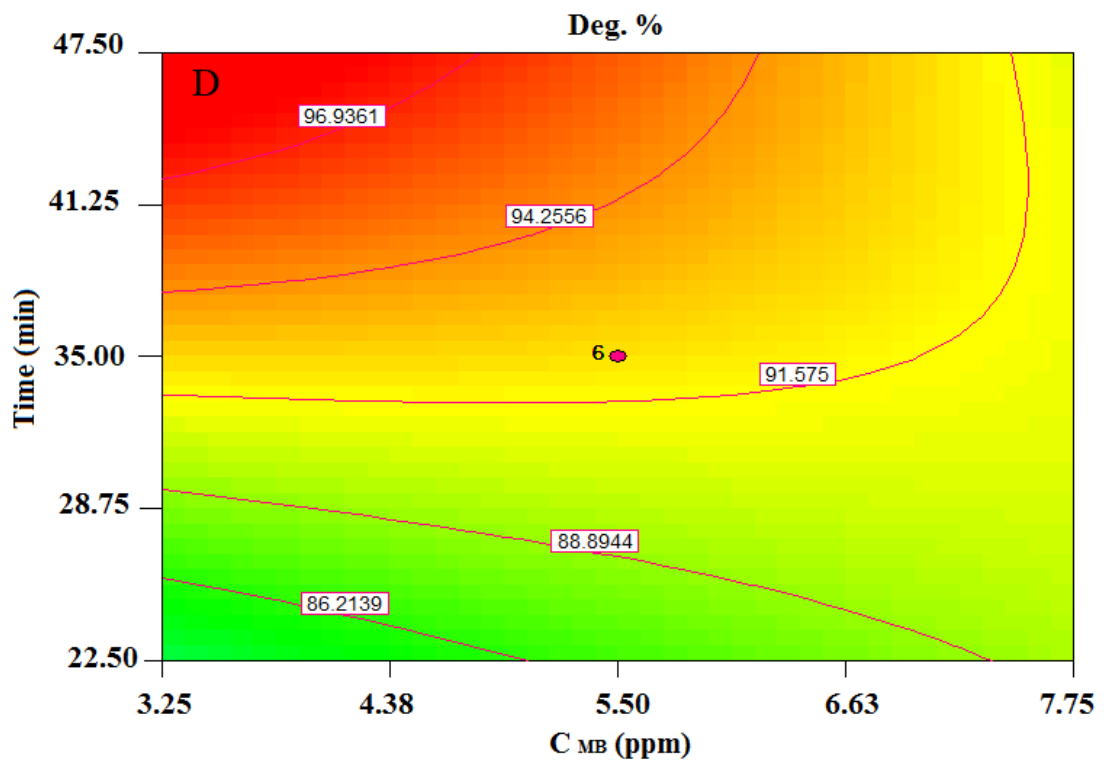

D

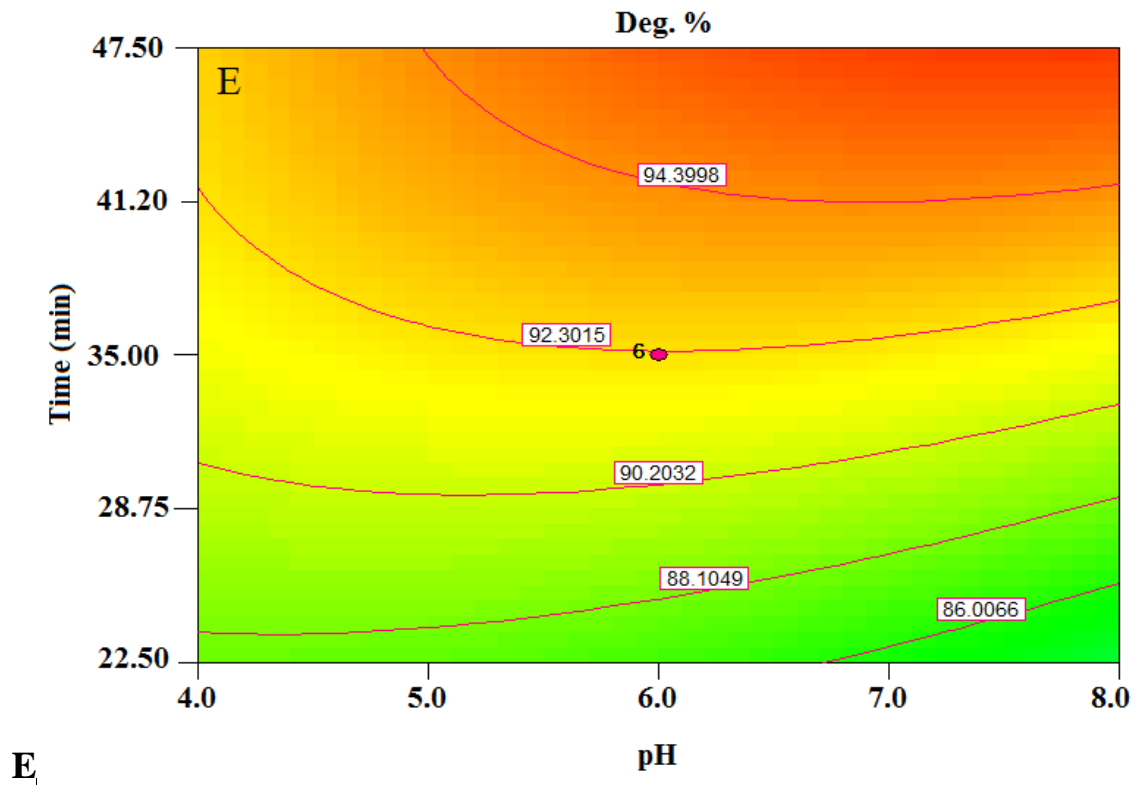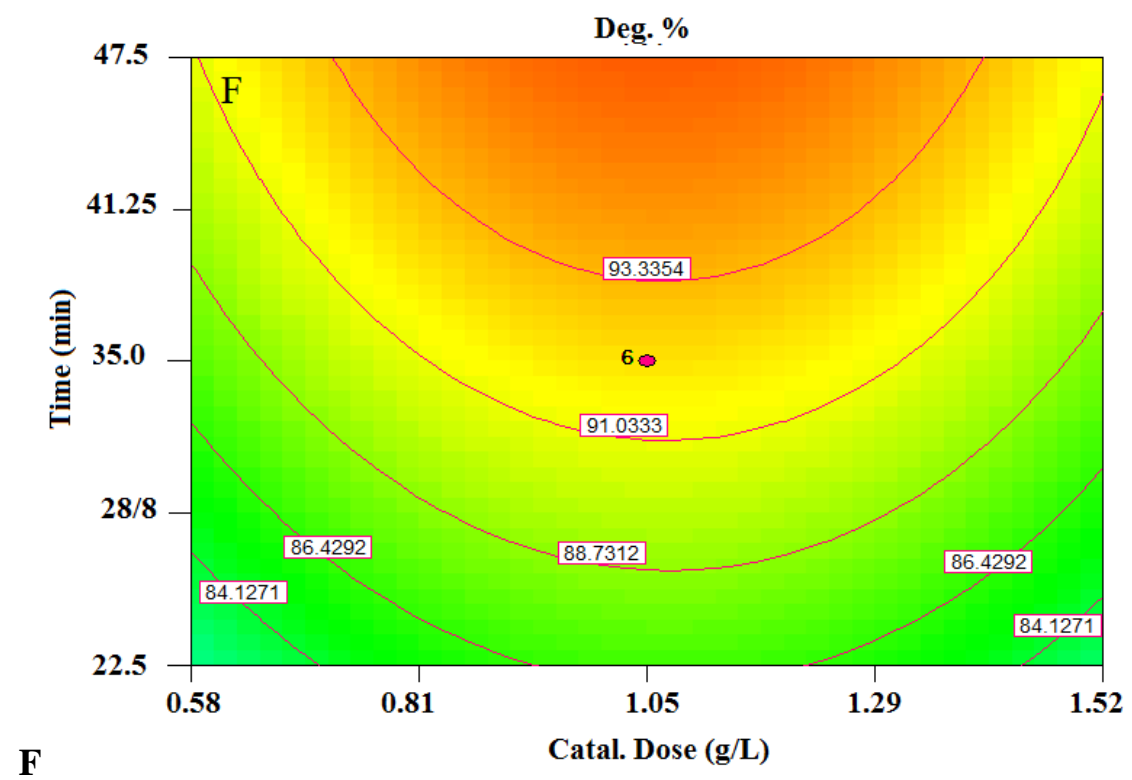

**SDF4.** 2D counter plots obtained in the RSM study of MB photodegradation by AgI/WO<sub>3</sub> binary catalyst.
